# Supplementary material
Source: publisher figshare collection journal article supplement (https://frontiersin.figshare.com/ndownloader/files/12358451)
Supplement: Supplementary file [file 12358451]

A

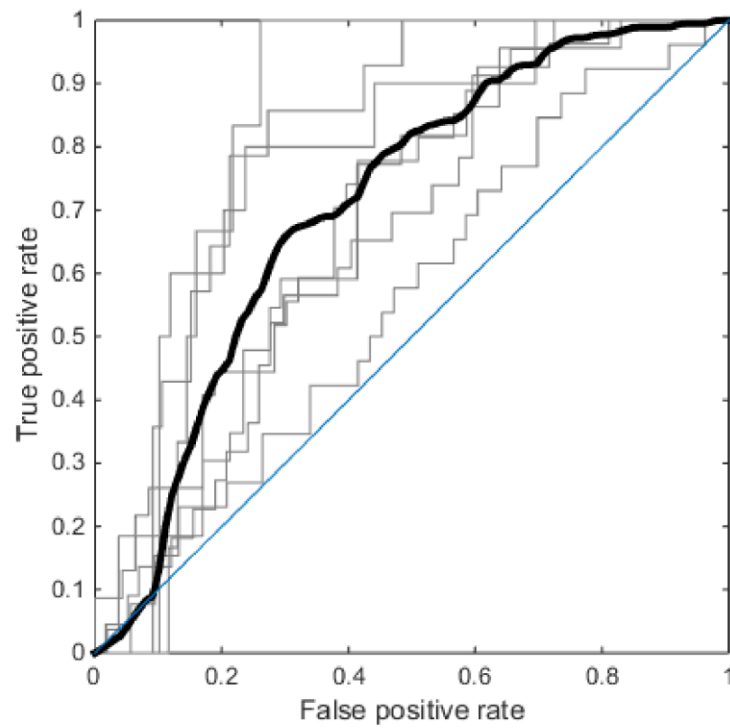

B

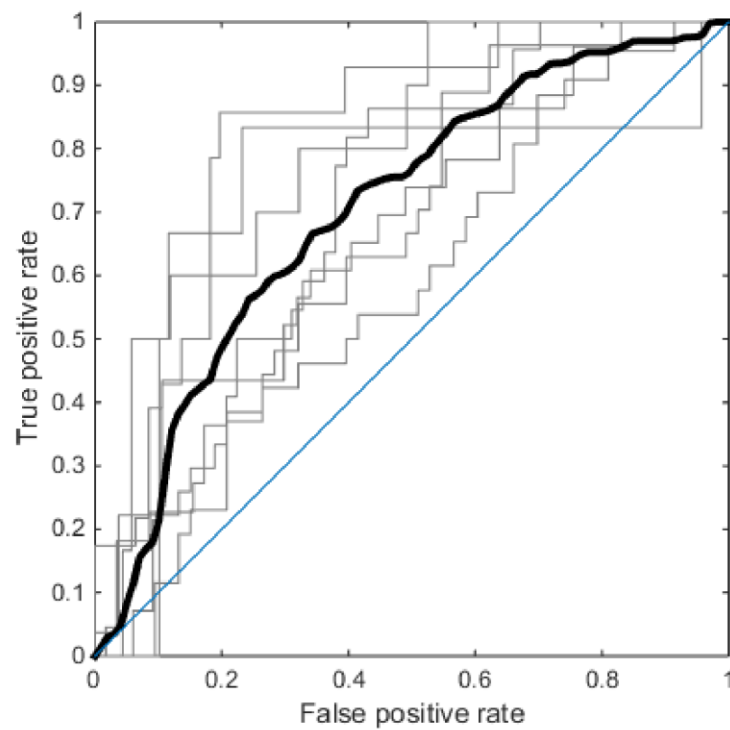

1

2

3

4

**Figure S7. A,** Receiver operator curves (signal detection theory) with false positive rate (x-axis) and true positive rate (y-axis) on which the AUCs were based, per CVI patient (gray) and average across all CVI patients (black). **B,** same as A but now for glaucoma patients.
